# Supplementary material for: Photo-crosslinked integrated triphasic scaffolds with gradient composition and strength for osteochondral regeneration
Source: Royal Society of Chemistry journal article supplement (doi:10.1039/d3tb02031b), 2024-01-01
Supplement: d3tb02031b1.pdf [file d3tb02031b1.pdf]

## Supplementary material

This PDF file includes:

Fig. S1 to S3

Table S1 to S2

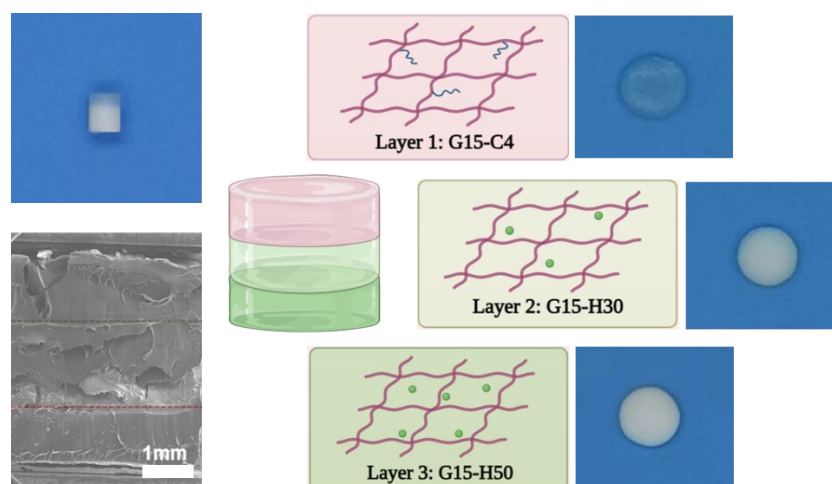

Fig. S1 Images of the integrated triphasic scaffold.

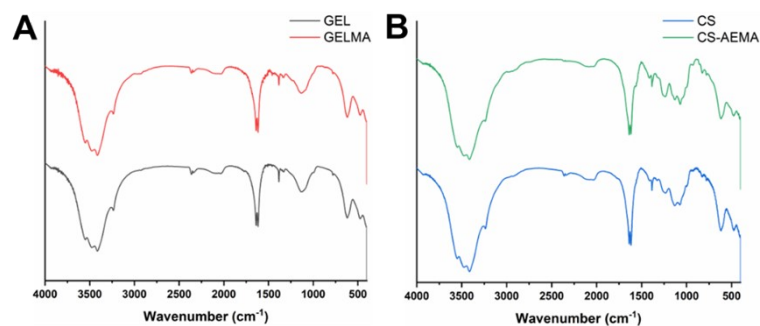

Fig. S2 FTIR spectra of (A) GEL and GELMA, (B) CS and CS-AEMA.

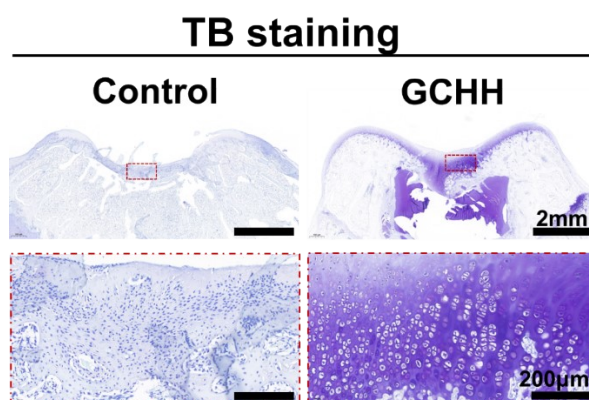

Fig. S3 Toluidine blue staining of regenerated tissue at week 8.

**Table S1.** The sequences of the specific primers.

| Gene         | Primer (5'-3')                  |
|--------------|---------------------------------|
| <b>GAPDH</b> | FORWARD: TCGGAGTGAACGGATTTGGC   |
|              | REVERSE: TTCCCGTTCTCAGCCTTGAC   |
| <b>COL-1</b> | FORWARD: CACGGACTTTGGAGATTTGTTT |
|              | REVERSE: CCACTCGGGTCTTCAAGCA    |
| <b>SOX9</b>  | FORWARD: ACCTCAAGAAGGAGAGCGAAG  |
|              | REVERSE: GACCAGCGTCCAGTCGTAG    |
| <b>OPN</b>   | FORWARD: CACCATGAGAATCGCCGTGA   |
|              | REVERSE: ATCAGCGTGTTAACCGGA     |

**Table S2.** International Cartilage Repair Society (ICRS) cartilage repair assessment tool.

|                                   | Criteria                                                                           | Points |
|-----------------------------------|------------------------------------------------------------------------------------|--------|
| <b>Degree of defect repair</b>    | Level with surrounding cartilage                                                   | 4      |
|                                   | 75% repair of defect depth                                                         | 3      |
|                                   | 50% repair of defect depth                                                         | 2      |
|                                   | 25% repair of defect depth                                                         | 1      |
|                                   | 0% repair of defect depth                                                          | 0      |
| <b>Integration to border zone</b> | Complete integration with surrounding cartilage                                    | 4      |
|                                   | Demarcating border <1mm                                                            | 3      |
|                                   | 3/4 of graft integrated, 1/4 with a notable border >1mm width                      | 2      |
|                                   | 1/2 of graft integrated with surrounding cartilage, 1/2 with a notable border >1mm | 1      |
|                                   | From no contact to 1/4 of graft integrated with surrounding cartilage              | 0      |
| <b>Macroscopic appearance</b>     | Intact smooth surface                                                              | 4      |
|                                   | Fibrillated surface                                                                | 3      |
|                                   | Small, scattered fissure or cracks                                                 | 2      |
|                                   | Several, small or few but large fissures                                           | 1      |
|                                   | Total degeneration of grafted area                                                 | 0      |
| <b>Overall score</b>              | Grade I normal                                                                     | 12     |
|                                   | Grade II nearly normal                                                             | 11-8   |
|                                   | Grade III abnormal                                                                 | 7-4    |
|                                   | Grade IV severely abnormal                                                         | 3-1    |
